# Supplementary material for: Prognostic Value of Immune Environment Analysis in Small Bowel Adenocarcinomas with Verified Mutational Landscape and Predisposing Conditions
Source: Cancers (Basel). 2020 Jul 23;12(8):2018. doi: 10.3390/cancers12082018 (PMC7463640; doi:10.3390/cancers12082018)
Supplement: Supplementary file 1 [file cancers-12-02018-s001.pdf]

# Supplementary Materials:

## Prognostic Value of Immune Environment Analysis in Small Bowel Adenocarcinomas with Verified Mutational Landscape and Predisposing Conditions

**Table S1a.** Correlations between immune parameters and different mutation types and detected mutational signatures in MSS tumours.

|               |                | ICS    | PD-1   | PD-L1 <sup>IC</sup> | Immunoprofile |
|---------------|----------------|--------|--------|---------------------|---------------|
| Synonymous    | r <sub>s</sub> | -0.114 | -0.118 | -0.044              | -0.093        |
|               | P              | 0.317  | 0.302  | 0.701               | 0.418         |
| Nonsynonymous | r <sub>s</sub> | -0.065 | -0.069 | 0.033               | -0.008        |
|               | P              | 0.569  | 0.548  | 0.776               | 0.945         |
| Missense      | r <sub>s</sub> | -0.066 | -0.063 | 0.044               | -0.003        |
|               | P              | 0.562  | 0.581  | 0.701               | 0.978         |
| Splicesite    | r <sub>s</sub> | -0.035 | -0.183 | -0.042              | -0.074        |
|               | P              | 0.759  | 0.107  | 0.712               | 0.519         |
| Nonsense      | r <sub>s</sub> | -0.058 | -0.060 | -0.067              | -0.041        |
|               | P              | 0.612  | 0.602  | 0.555               | 0.724         |
| FrameShift    | r <sub>s</sub> | 0.033  | -0.042 | 0.039               | 0.048         |
|               | P              | 0.772  | 0.713  | 0.731               | 0.675         |
| Inframe       | r <sub>s</sub> | -0.012 | 0.150  | -0.062              | 0.028         |
|               | P              | 0.919  | 0.188  | 0.588               | 0.805         |
| Signature 1A  | r <sub>s</sub> | -0.199 | -0.146 | -0.096              | -0.184        |
|               | P              | 0.078  | 0.200  | 0.399               | 0.107         |
| Signature 17  | r <sub>s</sub> | 0.146  | 0.073  | 0.318               | 0.269         |
|               | P              | 0.199  | 0.523  | 0.004               | 0.017         |
| Signature U2  | r <sub>s</sub> | -0.006 | 0.115  | 0.099               | 0.081         |
|               | P              | 0.958  | 0.314  | 0.385               | 0.479         |

Abbreviations: ICS, immune cell score; PD-1, programmed cell death 1; PD-L1<sup>IC</sup>, programmed death ligand 1 positive immune cells; r<sub>s</sub>, Spearman correlation coefficient. The mutation types include all somatic changes in the coding regions detected by exome sequencing in MSS tumours.

**Supplementary Table S1b.** Correlations between immune parameters and different mutation types in MSI tumours.

|               |                | ICS    | PD-1   | PD-L1 <sup>IC</sup> | Immunoprofile |
|---------------|----------------|--------|--------|---------------------|---------------|
| Synonymous    | r <sub>s</sub> | -0.471 | -0.405 | -0.166              | -0.381        |
|               | P              | 0.089  | 0.151  | 0.570               | 0.179         |
| Nonsynonymous | r <sub>s</sub> | -0.392 | -0.405 | -0.166              | -0.323        |
|               | P              | 0.165  | 0.151  | 0.570               | 0.260         |
| Missense      | r <sub>s</sub> | -0.392 | -0.405 | -0.203              | -0.352        |
|               | P              | 0.165  | 0.151  | 0.486               | 0.217         |
| Splicesite    | r <sub>s</sub> | -0.216 | -0.279 | -0.056              | -0.136        |
|               | P              | 0.458  | 0.334  | 0.850               | 0.642         |
| Nonsense      | r <sub>s</sub> | -0.353 | -0.253 | -0.018              | -0.215        |
|               | P              | 0.216  | 0.382  | 0.950               | 0.461         |
| FrameShift    | r <sub>s</sub> | -0.275 | -0.101 | -0.018              | -0.193        |
|               | P              | 0.342  | 0.730  | 0.950               | 0.509         |
| Inframe       | r <sub>s</sub> | -0.118 | 0.051  | 0.167               | 0.031         |
|               | P              | 0.687  | 0.863  | 0.568               | 0.915         |

Abbreviations: ICS, immune cell score; PD-1, programmed cell death 1; PD-L1<sup>IC</sup>, programmed death ligand 1 positive immune cells; r<sub>s</sub>, Spearman correlation coefficient. The mutation types include all somatic changes in the coding regions detected by exome sequencing in MSI tumours.

**Table S2.** Survival according to clinicopathological variables.

|                         | Disease-Specific Survival |                 |                  |                 | Overall Survival |                 |                  |                 |
|-------------------------|---------------------------|-----------------|------------------|-----------------|------------------|-----------------|------------------|-----------------|
|                         | N                         | 5-Year Survival | 10-Year Survival | <i>p</i> -Value | N                | 5-year survival | 10-Year Survival | <i>p</i> -Value |
| Age:                    |                           |                 |                  |                 |                  |                 |                  |                 |
| <60 years               | 37                        | 43%             | 37%              | 0.611           | 37               | 43%             | 34%              | 0.637           |
| ≥60 years               | 50                        | 49%             | 42%              |                 | 50               | 40%             | 30%              |                 |
| Sex:                    |                           |                 |                  |                 |                  |                 |                  |                 |
| female                  | 40                        | 48%             | 40%              | 0.827           | 40               | 43%             | 36%              | 0.533           |
| male                    | 47                        | 45%             | 40%              |                 | 47               | 40%             | 29%              |                 |
| TNM stage:              |                           |                 |                  |                 |                  |                 |                  |                 |
| I                       | 4                         | 75%             | 75%              | <0.001          | 4                | 75%             | 25%              | <0.001          |
| II                      | 18                        | 67%             | 61%              |                 | 18               | 67%             | 55%              |                 |
| III                     | 24                        | 70%             | 60%              |                 | 24               | 67%             | 57%              |                 |
| IV                      | 31                        | 7%              | 7%               |                 | 31               | 7%              | 7%               |                 |
| Tumour grade            |                           |                 |                  |                 |                  |                 |                  |                 |
| 1                       | 16                        | 41%             | 14%              | 0.397           | 16               | 31%             | 10%              | 0.530           |
| 2                       | 53                        | 52%             | 47%              |                 | 53               | 47%             | 37%              |                 |
| 3                       | 15                        | 40%             | 40%              |                 | 15               | 40%             | 40%              |                 |
| Immune cell score       |                           |                 |                  |                 |                  |                 |                  |                 |
| 0                       | 26                        | 29%             | 24%              | 0.009           | 26               | 23%             | 15%              | 0.002           |
| 1                       | 12                        | 37%             | 24%              |                 | 12               | 33%             | 22%              |                 |
| 2                       | 15                        | 24%             | 24%              |                 | 15               | 20%             | 20%              |                 |
| 3                       | 10                        | 69%             | 41%              |                 | 10               | 60%             | 36%              |                 |
| 4                       | 24                        | 71%             | 71%              |                 | 24               | 71%             | 62%              |                 |
| Immune cell score       |                           |                 |                  |                 |                  |                 |                  |                 |
| low                     | 53                        | 30%             | 24%              | <0.001          | 53               | 25%             | 18%              | <0.001          |
| high                    | 34                        | 70%             | 63%              |                 | 34               | 68%             | 55%              |                 |
| PD-L1 <sup>high</sup>   |                           |                 |                  |                 |                  |                 |                  |                 |
| no                      | 60                        | 31%             | 24%              | <0.001          | 60               | 27%             | 18%              | <0.001          |
| yes                     | 27                        | 80%             | 76%              |                 | 27               | 74%             | 62%              |                 |
| PD-L1 <sup>Chigh</sup>  |                           |                 |                  |                 |                  |                 |                  |                 |
| no                      | 64                        | 33%             | 26%              | <0.001          | 64               | 28%             | 20%              | <0.001          |
| yes                     | 22                        | 81%             | 76%              |                 | 22               | 77%             | 63%              |                 |
| PD-L1 <sup>TChigh</sup> |                           |                 |                  |                 |                  |                 |                  |                 |
| no                      | 79                        | 49%             | 42%              | 0.060           | 79               | 43%             | 33%              | 0.137           |
| yes                     | 7                         | 14%             | 14%              |                 | 7                | 14%             | 14%              |                 |
| Immunoprofile:          |                           |                 |                  |                 |                  |                 |                  |                 |
| 0                       | 43                        | 26%             | 18%              | <0.001          | 43               | 21%             | 12%              | <0.001          |
| 1                       | 17                        | 36%             | 27%              |                 | 17               | 29%             | 22%              |                 |
| 2                       | 12                        | 73%             | 73%              |                 | 12               | 67%             | 67%              |                 |
| 3                       | 14                        | 93%             | 85%              |                 | 14               | 93%             | 71%              |                 |
| MMR status:             |                           |                 |                  |                 |                  |                 |                  |                 |
| MSS                     | 73                        | 39%             | 31%              | 0.003           | 73               | 34%             | 23%              | 0.001           |
| MSI                     | 14                        | 85%             | 85%              |                 | 14               | 79%             | 79%              |                 |
| TMB                     |                           |                 |                  |                 |                  |                 |                  |                 |
| low                     | 69                        | 39%             | 32%              | 0.009           | 69               | 33%             | 23%              | 0.003           |
| high                    | 18                        | 77%             | 70%              |                 | 18               | 72%             | 66%              |                 |
| Tumour location:        |                           |                 |                  |                 |                  |                 |                  |                 |
| duodenal                | 17                        | 50%             | 50%              | 0.034           | 17               | 47%             | 29%              | 0.010           |
| jejunum                 | 47                        | 52%             | 48%              |                 | 47               | 51%             | 44%              |                 |
| ileum                   | 14                        | 34%             | 11%              |                 | 14               | 21%             | 7%               |                 |
| Coeliac disease:        |                           |                 |                  |                 |                  |                 |                  |                 |
| no                      | 78                        | 42%             | 35%              | 0.045           | 78               | 37%             | 27%              | 0.014           |
| yes                     | 9                         | 78%             | 78%              |                 | 9                | 78%             | 78%              |                 |

**Table S3.** Multivariable analysis with Immune cell score, PD-1 and PD-L1<sup>IC</sup>, and without MMR status.

|                     | Univariable Analysis | Disease-Specific Survival<br>(n = 68) |                 | Overall Survival<br>(n = 68) |                 |
|---------------------|----------------------|---------------------------------------|-----------------|------------------------------|-----------------|
|                     | <i>p</i> -Value      | HR (95% CI)                           | <i>p</i> -Value | HR (95% CI)                  | <i>p</i> -Value |
| Age                 |                      |                                       |                 |                              |                 |
| <60 years           | DSS: 0.614           | 1                                     | 0.247           | 1                            | 0.170           |
| ≥60 years           | OS: 0.640            | 1.63 (0.71–3.74)                      |                 | 1.71 (0.80–3.68)             |                 |
| Sex                 |                      |                                       |                 |                              |                 |
| Female              | DSS: 0.829           | 1                                     | 0.217           | 1                            | 0.348           |
| Male                | OS: 0.536            | 0.63 (0.30–1.31)                      |                 | 0.71 (0.35–1.45)             |                 |
| TNM stage           |                      |                                       |                 |                              |                 |
| I                   |                      | 1                                     | <0.001          | 1                            | <0.001          |
| II                  | DSS: <0.001          | 2.15 (0.20–23.39)                     |                 | 0.76 (0.14–4.04)             |                 |
| III                 |                      | 3.07 (0.31–30.86)                     |                 | 0.97 (0.20–4.78)             |                 |
| IV                  | OS: <0.001           | 16.35 (1.39–191.99)                   |                 | 6.58 (1.11–38.92)            |                 |
| Immune cell score   |                      |                                       |                 |                              |                 |
| low                 | DSS: 0.001           | 2.01 (0.79–5.10)                      | 0.142           | 2.43 (0.98–6.06)             | 0.056           |
| high                | OS: <0.001           | 1                                     |                 | 1                            |                 |
| PD-1                |                      |                                       |                 |                              |                 |
| low                 | DSS: <0.001          | 1.76 (0.44–7.09)                      | 0.426           | 0.99 (0.29–3.40)             | 0.988           |
| high                | OS: <0.001           | 1                                     |                 | 1                            |                 |
| PD-L1 <sup>IC</sup> |                      |                                       |                 |                              |                 |
| low                 | DSS: <0.001          | 5.87 (1.55–22.28)                     | 0.009           | 4.94 (1.55–15.69)            | 0.007           |
| high                | OS: <0.001           | 1                                     |                 | 1                            |                 |
| Tumour location     |                      |                                       |                 |                              |                 |
| Duodenum            |                      | 1                                     | <0.001          | 1                            | 0.001           |
| Jejunum             | DSS: 0.043           | 0.79 (0.23–2.65)                      |                 | 0.73 (0.24–2.22)             |                 |
| Ileum               | OS: 0.015            | 6.96 (1.40–34.61)                     |                 | 5.03 (1.13–22.37)            |                 |

Abbreviations: HR, hazard ratio; CI, confidence interval; DSS, disease-specific survival; OS, Overall survival; PD-1, programmed cell death protein 1; PD-L1, programmed death ligand 1; IC, immune cell. Analyses were performed with the following reference categories: <60 years, Female gender, TNM Stage I, high Immune cell score, high PD-1, high PD-L1<sup>IC</sup>, and duodenal tumour location. For analyses there were 68 patients available. Eleven patients were excluded because of unknown TNM stage, one patient had insufficient samples for Immune cell score and PD-1, one patient had insufficient samples for PD-L1<sup>IC</sup>, nine patients had unknown tumour location, three patients had insufficient survival data, and two patients were excluded because of postoperative death.

**Table S4.** Multivariable analysis with Immunoprofile and without MMR status.

|                 | Univariable analysis | Disease-specific survival<br>(n = 68) |                 | Overall survival<br>(n = 68) |                 |
|-----------------|----------------------|---------------------------------------|-----------------|------------------------------|-----------------|
|                 | <i>p</i> -Value      | HR (95% CI)                           | <i>p</i> -Value | HR (95% CI)                  | <i>p</i> -Value |
| Age             |                      |                                       |                 |                              |                 |
| <60             | DSS: 0.614           | 1                                     | 0.075           | 1                            | 0.061           |
| ≥60             | OS: 0.640            | 2.12 (0.93–4.85)                      |                 | 2.10 (0.97–4.54)             |                 |
| Sex             |                      |                                       |                 |                              |                 |
| Female          | DSS: 0.829           | 1                                     | 0.042           | 1                            | 0.068           |
| Male            | OS: 0.536            | 0.47 (0.23–0.97)                      |                 | 0.52 (0.26–1.05)             |                 |
| TNM stage       |                      |                                       |                 |                              |                 |
| I               |                      | 1                                     | <0.001          | 1                            | <0.001          |
| II              | DSS: <0.001          | 2.61 (0.25–26.94)                     |                 | 1.02 (0.20–5.25)             |                 |
| III             | OS: <0.001           | 5.43 (0.57–51.44)                     |                 | 1.89 (0.41–8.65)             |                 |
| IV              |                      | 27.18 (2.38–310.95)                   |                 | 10.88 (1.85–63.90)           |                 |
| Immunoprofile   |                      |                                       |                 |                              |                 |
| Low             | DSS: <0.001          | 11.96 (3.39–42.15)                    | <0.001          | 7.54 (2.75–20.67)            | <0.001          |
| High            | OS: <0.001           | 1                                     |                 | 1                            |                 |
| Tumour location |                      |                                       |                 |                              |                 |
| Duodenum        |                      | 1                                     | 0.002           | 1                            | 0.004           |
| Jejunum         | DSS: 0.043           | 0.60 (0.18–2.00)                      |                 | 0.53 (0.17–1.63)             |                 |
| Ileum           | OS: 0.015            | 3.28 (0.76–14.14)                     |                 | 2.35 (0.59–9.38)             |                 |

Abbreviations: HR, hazard ratio; CI, confidence interval; DSS, disease-specific survival; OS, Overall survival. Analyses were performed with the following reference categories: <60 years, female gender, TNM Stage I, high Immunoprofile, and duodenal tumour location. For analyses there were 68 patients available. Eleven patients were excluded because of unknown TNM stage, two patients were excluded because of insufficient samples for Immunoprofile, nine patients had unknown tumour location, three patients had insufficient survival data, and two patients were excluded because of postoperative death.

**Table S5.** Multivariable analysis with coeliac and Crohn's disease.

|                     | Univariable Analysis | Disease-Specific Survival<br>(n = 68) |         | Overall Survival<br>(n = 68) |         |
|---------------------|----------------------|---------------------------------------|---------|------------------------------|---------|
|                     | p-Value              | HR (95% CI)                           | p-Value | HR (95% CI)                  | p-Value |
| Age                 |                      |                                       |         |                              |         |
| <60 years           | DSS: 0.614           | 1                                     | 0.097   | 1                            | 0.044   |
| ≥60 years           | OS: 0.640            | 2.17 (0.87–5.40)                      |         | 2.41 (1.02–5.69)             |         |
| Sex                 |                      |                                       |         |                              |         |
| Female              | DSS: 0.829           | 1                                     | 0.250   | 1                            | 0.411   |
| Male                | OS: 0.536            | 0.66 (0.32–1.35)                      |         | 0.75 (0.38–1.49)             |         |
| TNM stage           |                      |                                       |         |                              |         |
| I                   |                      | 1                                     | 0.001   | 1                            | <0.001  |
| II                  | DSS: <0.001          | 3.66 (0.31–43.72)                     |         | 1.03 (0.17–6.20)             |         |
| III                 |                      | 6.61 (0.54–80.41)                     |         | 1.57 (0.25–9.80)             |         |
| IV                  | OS: <0.001           | 29.57 (2.21–395.27)                   |         | 10.27 (1.50–70.46)           |         |
| MMR status          |                      |                                       |         |                              |         |
| MSS                 | DSS: 0.010           | 2.90 (0.26–33.13)                     | 0.391   | 8.45 (0.81–88.24)            | 0.075   |
| MSI                 | OS: 0.004            | 1                                     |         | 1                            |         |
| Immune cell score   |                      |                                       |         |                              |         |
| low                 | DSS: 0.001           | 1.76 (0.69–4.53)                      | 0.239   | 2.14 (0.87–5.27)             | 0.097   |
| high                | OS: <0.001           | 1                                     |         | 1                            |         |
| PD-1                |                      |                                       |         |                              |         |
| low                 | DSS: <0.001          | 2.04 (0.40–10.37)                     | 0.390   | 0.81 (0.20–3.28)             | 0.768   |
| high                | OS: <0.001           | 1                                     |         | 1                            |         |
| PD-L1 <sup>IC</sup> |                      |                                       |         |                              |         |
| low                 | DSS: <0.001          | 4.83 (1.21–19.32)                     | 0.026   | 3.51 (1.12–11.04)            | 0.032   |
| high                | OS: <0.001           | 1                                     |         | 1                            |         |
| Tumour location     |                      |                                       |         |                              |         |
| Duodenum            |                      | 1                                     | <0.001  | 1                            | 0.001   |
| Jejunum             | DSS: 0.043           | 0.57 (0.15–2.27)                      |         | 0.71 (0.20–2.54)             |         |
| Ileum               | OS: 0.015            | 5.03 (0.95–26.78)                     |         | 5.20 (1.07–25.30)            |         |
| Coeliac disease     |                      |                                       |         |                              |         |
| No                  | DSS: 0.020           | 6.12 (0.62–60.34)                     | 0.121   | 5.59 (0.63–49.89)            | 0.124   |
| Yes                 | OS: 0.003            | 1                                     |         | 1                            |         |
| Crohn's disease     |                      |                                       |         |                              |         |
| No                  | DSS: 0.175           | 1.21 (0.31–4.66)                      | 0.782   | 0.90 (0.24–3.42)             | 0.882   |
| Yes                 | OS: 0.300            | 1                                     |         | 1                            |         |

Abbreviations: HR, hazard ratio; CI, confidence interval; DSS, disease-specific survival; OS, Overall survival; MMR, Mismatch repair; MSS, microsatellite stable; MSI, microsatellite instable; PD-1, programmed cell death protein 1; PD-L1, programmed death ligand 1; IC, immune cell. Analyses were performed with the following reference categories: <60 years, Female gender, TNM Stage I, MSI status, high Immune cell score, high PD-1, high PD-L1<sup>IC</sup>, duodenal tumour location, coeliac disease, and Crohn's disease. For analyses there were 68 patients available. Eleven patients were excluded because of unknown TNM stage, one patient had insufficient samples for Immune cell score and PD-1, one patient had insufficient samples for PD-L1<sup>IC</sup>, nine patients had unknown tumour location, three patients had insufficient survival data, and two patients were excluded because of postoperative death.
